# Supplementary material for: Neurovascular hand symptoms in relation to cold exposure in northern Sweden: a population-based study
Source: Springer Nature journal article supplement (doi:10.1007/s00420-017-1221-3), 2017-04-11
Supplement: MOESM1 [file 12216898]

**Article title:**

Neurovascular hand symptoms in relation to cold exposure in northern Sweden – a population-based study

**Journal name:**

International Archives of Occupational and Environmental Health

**Author names:**

A Stjernbrandt<sup>1</sup>, B Björ<sup>1</sup>, M Andersson<sup>1</sup>, L Burström<sup>1</sup>, I Liljelind<sup>1</sup>, T Nilsson<sup>1</sup>, R Lundström<sup>1,2</sup>, J Wahlström<sup>1</sup>

**Affiliations:**

<sup>1</sup>Department of Public Health and Clinical Medicine, Umeå University, 901 87 Umeå, Sweden

<sup>2</sup>Department of Radiation Sciences, Umeå University, 901 87 Umeå, Sweden

**Corresponding author:**

Dr. Albin Stjernbrandt

Occupational and Environmental Medicine

University Hospital of Umeå

901 85, Umeå

Tel +46 90 785 99 52

Fax +46 90 785 24 56

albin.stjernbrandt@umu.se

## Online Resource 1. Non-responder analysis

Non-responders and responders have been stratified according to sex, county, and age.

|                          |   | Non-responders |        | Responders |        |
|--------------------------|---|----------------|--------|------------|--------|
|                          |   | N              | %      | N          | %      |
| <b>County</b>            |   |                |        |            |        |
| Norrbotten               | ♂ | 3190           | 69.0   | 1436       | 31.0   |
|                          | ♀ | 2718           | 61.8   | 1679       | 38.2   |
| Västerbotten             | ♂ | 3733           | 67.2   | 1824       | 32.8   |
|                          | ♀ | 2934           | 58.1   | 2120       | 41.9   |
| Västernorrland           | ♂ | 3080           | 68.4   | 1425       | 31.6   |
|                          | ♀ | 2606           | 59.4   | 1778       | 40.6   |
| Jämtland                 | ♂ | 2356           | 69.1   | 1056       | 30.9   |
|                          | ♀ | 1847           | 58.5   | 1309       | 41.5   |
| <b>Age group [years]</b> |   |                |        |            |        |
| 18–30                    | ♂ | 3908           | 31.6   | 717        | 12.5   |
|                          | ♀ | 3130           | 31.0   | 965        | 14.0   |
| 31–45                    | ♂ | 2943           | 23.8   | 857        | 14.9   |
|                          | ♀ | 2437           | 24.1   | 1230       | 17.9   |
| 46–60                    | ♂ | 3027           | 24.5   | 1490       | 26.0   |
|                          | ♀ | 2406           | 23.8   | 1893       | 27.5   |
| 61–70                    | ♂ | 2481           | 20.1   | 2677       | 46.6   |
|                          | ♀ | 2132           | 21.1   | 2798       | 40.6   |
|                          |   | N              | SD     | N          | SD     |
| <b>Mean age</b>          |   |                |        |            |        |
|                          | ♂ | 41.3           | (15.0) | 51.6       | (14.6) |
|                          | ♀ | 41.6           | (15.2) | 49.8       | (14.6) |
